# Supplementary material for: The anti-adhesive effect of glycoclusters onPseudomonas aeruginosabacteria adhesion to epithelial cells studied by AFM single cell force spectroscopy
Source: Royal Society of Chemistry journal article supplement (doi:10.1039/c8nr03285h), 2018-01-01
Supplement: c8nr03285h1.pdf [file c8nr03285h1.pdf]

## Anti-adhesive effect of glycoclusters on *Pseudomonas aeruginosa* bacteria adhesion to epithelial cells studied by AFM Single Cell Force Spectroscopy

F. Zutton, C. Ligeour, O. Vidal, M. Wälte, F. Morvan, S. Vidal, J.-J. Vasseur, Y. Chevolut, M. Phaner-Goutorbe and H. Schillers

\* To whom correspondence should be addressed: [magali.phaner@ec-lyon.fr](mailto:magali.phaner@ec-lyon.fr)

### Supporting Information

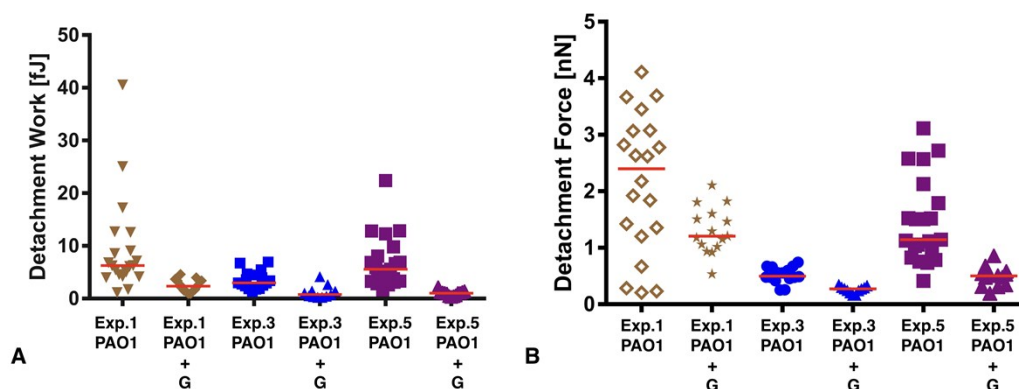

Figure S1: Exemplarily displaying data of three individual experiments for the relative reduction of A)  $W_D$  and B)  $F_D$  upon the addition of 130  $\mu\text{M}$  of glycocluster G. Each symbol represents a curve while red bars express median values.

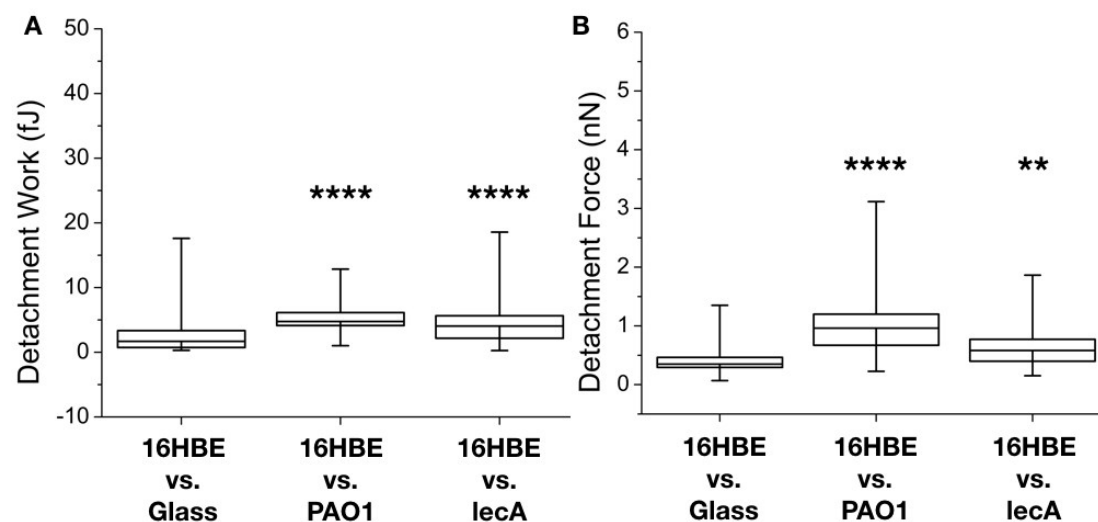

Figure S2: Quantification of A)  $W_D$  B)  $F_D$  for the interaction between 16HBE cells against glass (66 curves), PAO1 bacteria (98 curves) and *lecA* mutant (112 curves). The median values  $\pm$  SE (median) are represented, while the whiskers represent 5-95 percentile. The asterisk(s) indicates the p value calculated with the Mann-Whitney U test in comparison with the glass surface, \* $p < 0.05$  and \*\*\*\* $p < 0.0001$ .

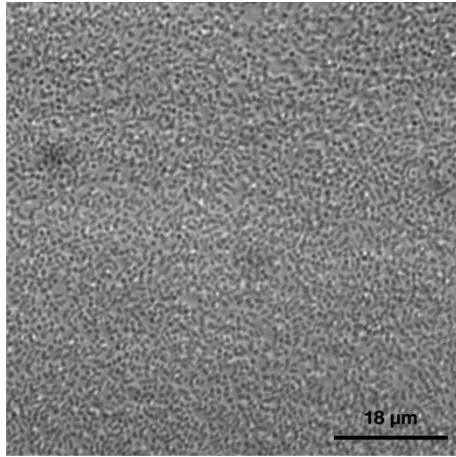

Figure S3: Bacterial monolayer. Image of a *lecA* bacterial monolayer on a glass dish, coverage density 57%. Image size 71 μm X 71 μm.
